# Supplementary material
Source: Research Square preprint supplement (doi:10.21203/rs.3.rs-9918838/v1)
Supplement: Supplementary file 1 [file b730135bd2efb6e4afcf791f.docx]

**Supplementary materials**

**Grid-level Source Tracing and Source Variation of Sand and Dust Storm Affecting in Beijing**

Jikang Wanga,b*, Cong Huaa, Yong Caoa,b

** Corresponding author email:* [*wangjk@cma.gov.cn*](mailto:wangjk@cma.gov.cn) *(J. Wang) Tel/Fax: +86-010-68406444*

*a National Meteorological Center,* *China Meteorological Administration, Beijing 100081, China*

*b Xiong’an Institute of Meteorological Artificial Intelligence, Xiong’an 071799, China*

**Content:**

**Table S1. Occurrence times of the 48 SDS events, observed and simulated PM₁₀ concentrations in selected cities, and their correlation coefficients.**

**Fig. S1. Correlation analysis between simulated and observed PM10 concentrations in selected cities**

**Fig. S2. Map of cities (in Inner Mongolia, China) and provinces (in Mongolia) within the domain dust source regions.**

**Fig. S3. The map of counties within the domain dust source regions.**

**Table S1**. Correlation analysis between simulated and observed PM10 concentrations in selected cities

| **Events period** | **Beijing** | | | **Huhhot** | | | **Yinchuan** | | | **Taiyuan** | | |
| --- | --- | --- | --- | --- | --- | --- | --- | --- | --- | --- | --- | --- |
| OBS | SIM | r | OBS | SIM | r | OBS | SIM | r | OBS | SIM | r |
| 20160303-20160304 | 806 | 947.7 | 0.46 | 1528 | 3258.5 | 0.42 | 1084 | 1713.7 | 0.70 | 432 | 609.2 | 0.67 |
| 20160331-20160402 | 710 | 717.1 | 0.90 | 1317 | 1275.8 | 0.69 | 600 | 275.7 | 0.54 | 269 | 182.5 | 0.24 |
| 20160421-20160422 | 383 | 148.0 | 0.48 | 1487 | 1304.3 | 0.96 | 223 | 146.5 | 0.62 | 255 | 333.5 | 0.48 |
| 20160430-20160501 | 366 | 197.3 | 0.64 | 994 | 625.0 | 0.68 | 1044 | 453.8 | 0.64 | 302 | 737.3 | 0.56 |
| 20160505-20160506 | 1000 | 1434.1 | 0.88 | 737 | 1167.1 | 0.75 | 527 | 611.8 | 0.61 | 173 | 131.8 | 0.51 |
| 20161125-20161126 | 252 | 211.6 | 0.62 | 670 | 353.1 | 0.30 | 600 | 449.6 | 0.84 | 411 | 876.3 | 0.84 |
| 20170417-20170417 | 399 | 1078.9 | 0.40 | 527 | 723.0 | 0.48 | 824 | 1252.8 | 0.69 | 1572 | 2661.6 | 0.57 |
| 20170503-20170507 | 1000 | 708.7 | 0.37 | 2906 | 5668.3 | 0.44 | 1871 | 3408.5 | 0.79 | 388 | 286.0 | 0.75 |
| 20180401-20180403 | 309 | 115.4 | 0.85 | 1737 | 1124.8 | 1.00 | 769 | 420.9 | 0.89 | 209 | 274.8 | 0.92 |
| 20180404-20180406 | 619 | 969.0 | 0.92 | 543 | 864.4 | 0.87 | 2116 | 612.8 | 0.56 | 246 | 659.3 | 0.48 |
| 20180521-20180523 | 548 | 543.8 | 0.65 | 822 | 1083.0 | 0.38 | 866 | 2465.5 | 0.42 | 1116 | 1326.8 | 0.93 |
| 20180524-20180526 | 402 | 400.1 | 0.80 | 3188 | 1788.3 | 0.90 | 1144 | 2135.8 | 0.37 | 696 | 321.9 | 0.49 |
| 20181125-20181127 | 661 | 262.5 | 0.67 | 2026 | 1429.3 | 0.91 | 713 | 4378.6 | 0.70 | 343 | 505.9 | 0.55 |
| 20181201-20181203 | 495 | 687.5 | 0.60 | 760 | 997.6 | 0.64 | 788 | 1137.8 | 0.33 | 242 | 259.8 | 0.74 |
| 20191027-20191030 | 595 | 278.0 | 0.91 | 1118 | 1100.0 | 0.78 | 476 | 758.7 | 0.48 | 258 | 511.1 | 0.76 |
| 20191117-20191118 | 473 | 278.3 | 0.84 | 567 | 981.7 | 0.71 | 217 | 310.3 | 0.65 | 177 | 175.1 | 1.00 |
| 20200318-20200318 | 628 | 783.1 | 0.83 | 504 | 491.0 | 0.77 | 511 | 723.8 | 0.57 | 310 | 714.9 | 0.75 |
| 20200511-20200512 | 851 | 666.4 | 0.88 | 3613 | 4257.7 | 0.95 | 1786 | 1405.9 | 0.57 | 349 | 464.1 | 0.63 |
| 20201020-20201021 | 316 | 227.6 | 0.63 | 1216 | 887.7 | 0.81 | 5546 | 5748.9 | 0.35 | 255 | 559.4 | 0.41 |
| 20210110-20210114 | 248 | 400.0 | 0.80 | 2803 | 2056.6 | 0.82 | 4080 | 4276.0 | 0.66 | 1949 | 821.8 | 0.84 |
| 20210313-20210318 | 9753 | 4929.3 | 0.94 | 9985 | 10763.8 | 0.77 | 1170 | 887.8 | 0.74 | 2034 | 4413.0 | 0.55 |
| 20210327-20210401 | 2743 | 3552.9 | 0.79 | 9985 | 10712.4 | 0.96 | 3207 | 1600.6 | 0.89 |  |  |  |
| 20210414-20210416 | 1515 | 867.3 | 0.55 | 2068 | 1354.0 | 0.91 | 1261 | 1485.4 | 0.78 | 1396 | 1096.5 | 0.86 |
| 20210506-20210508 | 2131 | 2152.6 | 0.75 | 2977 | 3749.5 | 0.92 | 1466 | 839.4 | 0.79 | 1701 | 1886.4 | 0.88 |
| 20210522-20210524 | 584 | 614.0 | 0.79 | 2620 | 2108.8 | 0.84 | 584 | 264.8 | 0.99 | 1734 | 2234.1 | 0.66 |
| 20220303-20220305 | 307 | 549.5 | 0.53 | 952 | 1397.0 | 0.74 |  |  |  | 309 | 424.1 | 0.63 |
| 20220425-20220427 | 210 | 202.0 | 0.58 | 574 | 682.9 | 0.47 | 612 | 406.6 | 0.75 | 474 | 655.4 | 0.60 |
| 20221127-20221129 | 330 | 272.6 | 0.84 | 371 | 416.9 | 0.92 | 698 | 471.4 | 0.63 | 435 | 384.8 | 0.73 |
| 20221211-20221213 | 1416 | 1816.9 | 0.94 | 2828 | 3485.8 | 0.72 |  |  |  | 189 | 180.0 | 0.53 |
| 20230309-20230312 | 1517 | 1904.4 | 0.84 | 2609 | 3616.7 | 0.68 | 1197 | 1866.9 | 0.57 | 551 | 536.0 | 0.64 |
| 20230313-20230315 | 526 | 347.1 | 0.83 | 2313 | 2746.3 | 0.87 |  |  |  | 688 | 759.0 | 0.52 |
| 20230319-20230324 | 2003 | 2069.4 | 0.65 | 2860 | 3435.1 | 0.59 | 1074 | 1011.3 | 0.79 | 1438 | 1466.7 | 0.94 |
| 20230409-20230413 | 1427 | 2295.2 | 0.67 | 1922 | 1825.4 | 0.49 | 705 | 901.0 | 0.52 | 1497 | 1536.3 | 0.76 |
| 20230418-20230421 | 323 | 589.3 | 0.67 | 2539 | 1362.7 | 0.93 | 3384 | 4735.4 | 0.69 | 217 | 133.2 | 0.36 |
| 20230424-20230426 | 409 | 715.6 | 0.90 | 348 | 589.2 | 0.52 |  |  |  | 482 | 508.8 | 0.80 |
| 20230519-20230522 | 543 | 1020.9 | 0.64 | 1143 | 621.9 | 0.55 | 682 | 933.0 | 0.92 | 257 | 259.1 | 0.75 |
| 20231102-20231103 | 208 | 789.6 | 0.52 | 997 | 1122.6 | 0.95 |  |  |  | 766 | 882.4 | 0.91 |
| 20231205-20231209 | 521 | 327.3 | 0.71 | 2055 | 981.2 | 0.91 | 252 | 586.5 | 0.49 | 580 | 816.8 | 0.68 |
| 20240314-20240317 | 297 | 505.5 | 0.57 | 2343 | 1034.4 | 0.85 | 719 | 998.2 | 0.75 | 313 | 427.3 | 0.70 |
| 20240327-20240329 | 1452 | 963.9 | 0.93 | 1099 | 761.1 | 0.71 | 229 | 468.2 | 0.66 | 199 | 326.5 | 0.70 |
| 20240412-20240415 | 415 | 198.9 | 0.54 | 607 | 687.1 | 0.92 | 2111 | 2108.9 | 0.95 | 355 | 365.0 | 0.96 |
| 20240510-20240511 | 1051 | 741.0 | 0.68 | 2167 | 899.4 | 0.74 | 683 | 130.1 | 0.41 | 534 | 439.7 | 0.42 |
| 20240621-20240624 | 695 | 614.7 | 0.77 | 989 | 1329.1 | 0.89 | 392 | 212.4 | 1.00 | 604 | 806.3 | 0.97 |
| 20250310-20250313 | 240 | 249.9 | 0.96 | 1660 | 1387.0 | 0.58 | 753 | 1172.6 | 0.59 | 1161 | 1062.5 | 0.74 |
| 20250322-20250328 | 413 | 731.2 | 0.46 | 1948 | 1066.4 | 0.71 | 910 | 1146.7 | 0.59 | 1560 | 1329.8 | 0.83 |
| 20250411-20250414 | 564 | 694.3 | 0.80 | 1377 | 1751.0 | 0.74 | 3125 | 4254.6 | 0.81 | 879 | 708.3 | 0.73 |
| 20250516-20250517 | 296 | 366.5 | 0.85 | 959 | 484.6 | 0.44 | 1037 | 1103.8 | 0.64 | 835 | 1173.0 | 0.53 |

Note: Sim and OBS denote the simulated and observed maximum PM₁₀ concentrations, respectively, and r represents the correlation coefficient between simulated and observed PM₁₀ concentrations for each event.


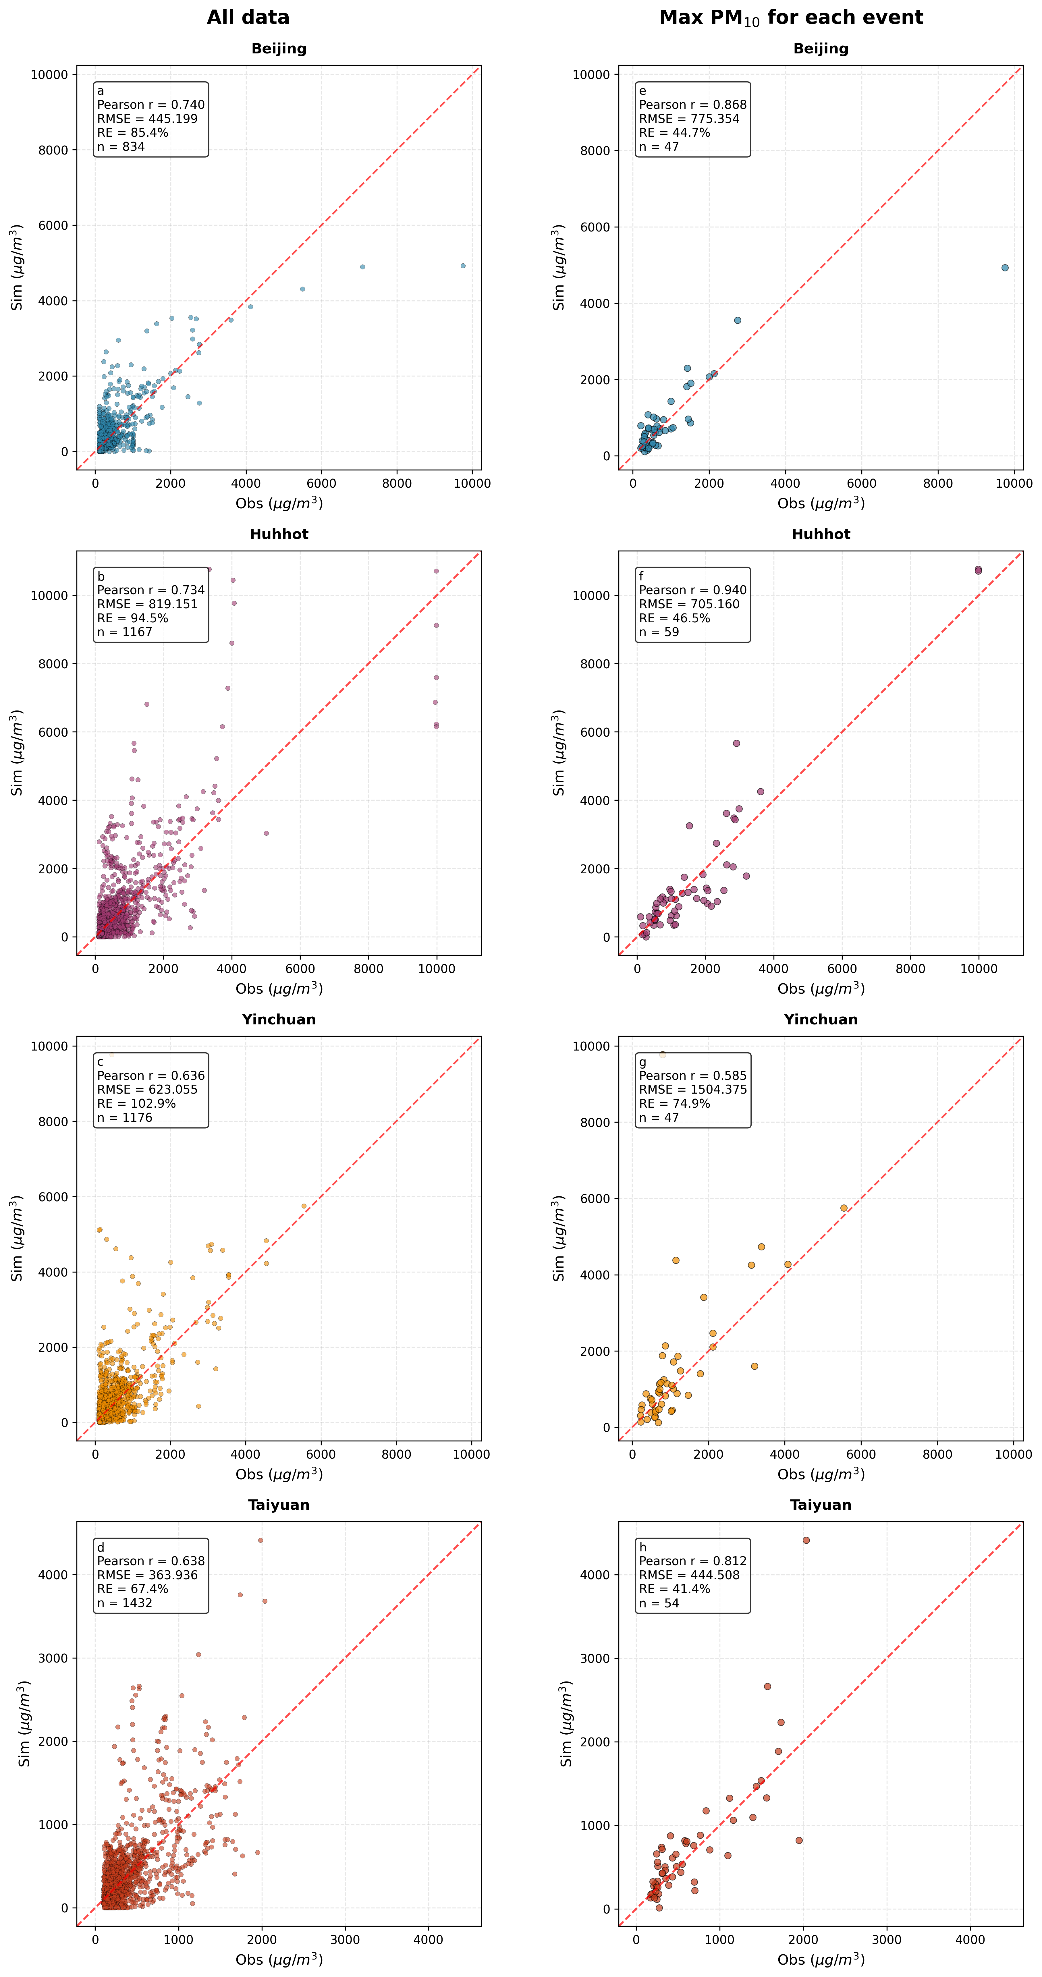


**Fig. S1.** Scatter plots between simulated and observed PM₁₀ concentrations in selected cities. The left column shows comparisons based on all observational data, and the right column shows comparisons based on the maximum concentration within each event.


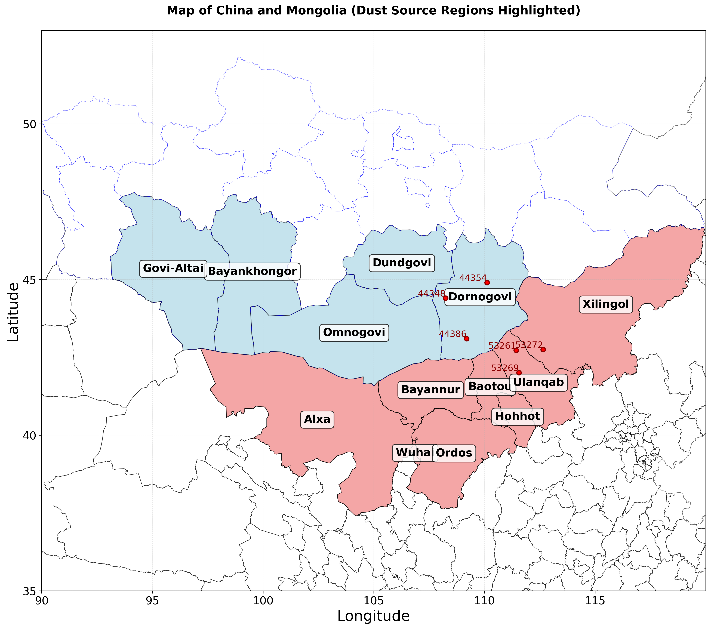


**Fig. S2. Map of cities (in Inner Mongolia, China) and provinces (in Mongolia) within the domain dust source regions.**


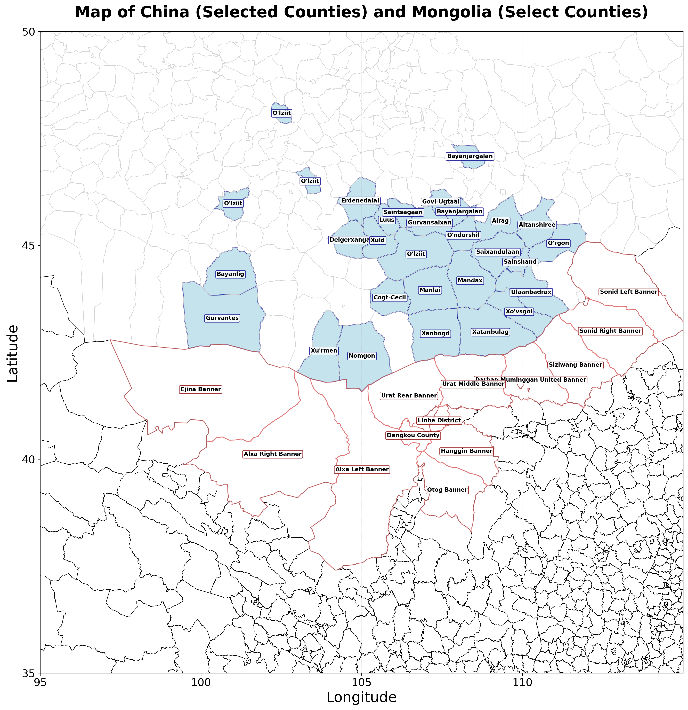


**Fig. S3. The map of counties within the domain dust source regions.**
